# Supplementary material for: Significant PTSD and Other Mental Health Effects Present 18 Months After the Fort Mcmurray Wildfire: Findings From 3,070 Grades 7–12 Students
Source: Front Psychiatry. 2019 Aug 30;10:623. doi: 10.3389/fpsyt.2019.00623 (PMC6728415; doi:10.3389/fpsyt.2019.00623)
Supplement: Supplementary file 3 [file Table_2.xlsx]

## Sheet: Supp Table 2
Supplementary Table 2 - Results Organized by Mental Health Condition
Measure	No impact of fire	Any impact of fire	P	Effect size	Present during fire	Not present during fire	P	Effect size	Witnessed fire	Did not see fire	P	Effect size	Home destroyed	Home not destroyed	P	Effect size	High resilience	Low resilience	P	Effect size	Measure
CPSS Score (PTSD)	13.4 +/- 11.6	12.8 +/- 11.5	0.39	0.06	12.8 +/- 11.5	13.0 +/- 11.4	0.79	-0.02	13.2 +/- 11.6	11.6 +/- 11.0	0.0021*	0.14	15.9 +/- 12.5	12.5 +/- 11.3	0.00001*	0.3	7.9 +/- 8.1	18.1 +/- 12.2	0.00001*	-0.99	CPSS Score (PTSD)
Probable PTSD	0.39	0.37	0.5		0.37	0.37	0.95		0.38	0.32	0.0042*		0.46	0.36	0.00033*		0.18	0.56	0.00001*		Probable PTSD
PHQ-A Score (depression)	8.0 +/- 6.1	8.0 +/- 6.5	0.89	-0.01	8.1 +/- 6.5	7.8 +/- 6.1	0.51	0.04	8.2 +/- 6.6	7.2 +/- 6.0	0.00046*	0.16	9.1 +/- 6.8	7.9 +/- 6.4	0.0018*	0.19	5.2 +/- 4.6	11.0 +/- 6.8	0.00001*	-1	PHQ-A Score (depression)
Probable depression	0.32	0.31	0.58		0.31	0.3	0.9		0.32	0.26	0.0075*		0.36	0.3	0.039		0.14	0.49	0.00001*		Probable depression
Probable moderately severe depression	0.15	0.17	0.35		0.17	0.14	0.21		0.18	0.13	0.0032*		0.22	0.16	0.027*		0.05	0.3	0.00001*		Probable moderately severe depression
Suicidal thinking	0.11	0.16	0.036		0.16	0.11	0.026*		0.17	0.12	0.0011*		0.19	0.15	0.11		0.05	0.27	0.00001*		Suicidal thinking
HADS Score (anxiety)	7.7 +/- 4.7	7.7 +/- 4.7	0.95	0	7.7 +/- 4.7	7.7 +/- 4.6	0.93	0.01	7.9 +/- 4.8	7.2 +/- 4.5	0.0023*	0.14	8.6 +/- 5.1	7.7 +/- 4.7	0.00083*	0.2	6.1 +/- 4.0	9.5 +/- 4.8	0.00001*	-0.79	HADS Score (anxiety)
Probable anxiety	0.26	0.27	0.72		0.27	0.25	0.47		0.28	0.22	0.0018*		0.35	0.26	0.0023*		0.14	0.41	0.00001*		Probable anxiety
CRAFFT Score (alcohol / drugs)	0.56 +/- 1.32	0.55 +/- 1.24	0.92	0.01	0.55 +/- 1.24	0.52 +/- 1.29	0.62	0.03	0.60 +/- 1.29	0.35 +/- 1.06	0.00001*	0.2	0.78 +/- 1.44	0.52 +/- 1.22	0.0011*	0.2	0.30 +/- 0.89	0.81 +/- 1.50	0.00001*	-0.42	CRAFFT Score (alcohol / drugs)
Probable alcohol/substance use disorder	0.14	0.15	0.79		0.15	0.13	0.32		0.16	0.09	0.00001*		0.22	0.14	0.00019*		0.08	0.22	0.00001*		Probable alcohol/substance use disorder
Tobacco use	0.13	0.12	0.77		0.13	0.12	0.79		0.14	0.07	0.00001*		0.16	0.12	0.033		0.08	0.17	0.00001*		Tobacco use
Any of 4 probable diagnoses	0.49	0.47	0.44		0.47	0.47	0.91		0.49	0.41	0.00022*		0.58	0.46	0.00008*		0.29	0.67	0.00001*		Any of 4 probable diagnoses
Rosenberg Score (self-esteem)	17.8 +/- 6.0	18.3 +/- 6.6	0.31	-0.06	18.2 +/- 6.6	18.1 +/- 5.9	0.74	0.02	18.1 +/- 6.7	18.6 +/- 6.1	0.076	-0.08	17.2 +/- 6.8	18.3 +/- 6.5	0.0049*	-0.17	21.6 +/- 5.2	14.6 +/- 6.0	0.00001*	1.24	Rosenberg Score (self-esteem)
Kidscreen Score (quality of life)	26.4 +/- 7.6	27.0 +/- 8.3	0.23	-0.08	27.0 +/- 8.3	26.5 +/- 7.7	0.27	0.06	26.8 +/- 8.3	27.7 +/- 7.8	0.019*	-0.11	25.4 +/- 8.7	27.2 +/- 8.1	0.00058*	-0.21	31.3 +/- 6.5	22.4 +/- 7.3	0.00001*	1.3	Kidscreen Score (quality of life)
CYRM-12 (resilience)	44.9 +/- 9.7	46.6 +/- 9.1	0.0042*	-0.19	46.7 +/- 9.1	45.0 +/- 9.7	0.0025*	0.18	46.6 +/- 9.1	46.0 +/- 9.5	0.19	0.06	44.8 +/- 10.0	46.7 +/- 9.1	0.0013*	-0.2	53.7 +/- 3.7	38.8 +/- 6.7			CYRM-12 (resilience)
Supplementary Table 2 provides the same information as in Tables 3-7 but with rows organized by mental health condition, for convenience of the reader.
* p-value survives FDR multiple comparison correction (threshold 0.027)
Scores are means +/- standard deviation (not standard error).
